1 **Maternal loading of a small heat shock protein increases embryo thermal**  
2 **tolerance in *Drosophila melanogaster***

3  
4  
5  
6  
7 Brent L. Lockwood\*, Cole R. Julick<sup>†</sup>, and Kristi L. Montooth<sup>†</sup>

8  
9  
10  
11 \*Department of Biology, University of Vermont, Burlington, VT 05405

12  
13 <sup>†</sup>School of Biological Sciences, University of Nebraska, Lincoln, NE 68588

14  
15  
16  
17  
18 Running title: *Hsp23* maternal effect in *Drosophila*

19  
20  
21  
22 Keywords: development, *Drosophila*, maternal effect, small heat shock protein, thermal  
23 tolerance

24  
25  
26  
27 Corresponding author:

28  
29 Brent L. Lockwood, Department of Biology, University of Vermont, 120 Marsh Life  
30 Science, 109 Carrigan Dr., Burlington, VT 05405. Phone: 802-656-1321. E-mail:  
31 Brent.Lockwood@uvm.edu.

35 **SUMMARY STATEMENT**

36 A gene-specific maternal effect confers thermal tolerance to offspring embryos in the  
37 fruit fly *Drosophila melanogaster*.

38

39 **ABSTRACT**

40 Maternal investment is likely to have direct effects on offspring survival. In oviparous  
41 animals whose embryos are exposed to the external environment, maternal provisioning  
42 of molecular factors like mRNAs and proteins may help embryos cope with sudden  
43 changes in the environment. Here we sought to modify the maternal mRNA contribution  
44 to offspring embryos and test for maternal effects on acute thermal tolerance in early  
45 embryos of *Drosophila melanogaster*. We drove in vivo overexpression of a small heat  
46 shock protein gene (*Hsp23*) in female ovaries and measured the effects of acute  
47 thermal stress on offspring embryonic survival and larval development. We report that  
48 overexpression of the *Hsp23* gene in female ovaries produced offspring embryos with  
49 increased thermal tolerance. We also found that brief heat stress in the early embryonic  
50 stage (0 to 1 hour-old) caused decreased larval performance later in life (5 to 10 days-  
51 old), as indexed by pupation height, as well as increased development time to pupation.  
52 Maternal overexpression of *Hsp23* protected embryos against these heat-induced larval  
53 defects. Our data demonstrate that transient products of single genes have large and  
54 lasting effects on whole-organism environmental tolerance. Further, our results suggest  
55 that maternal effects have a profound impact on offspring survival in the context of  
56 thermal variability.

57

## 58 INTRODUCTION

59 Acute thermal stress is principally felt at the cellular and biochemical levels through the  
60 disruption of macromolecular structures (Richter et al., 2010; Somero et al., 2017).  
61 These thermal perturbations pose challenges for ectotherms that live in variable thermal  
62 environments where sudden changes in temperature are a frequent occurrence (Denny  
63 et al., 2011; Terblanche et al., 2011; Dowd et al., 2015; Buckley and Huey, 2016).  
64 Thermal stress causes proteins to unfold, which not only leads to the loss of protein  
65 function but also to protein aggregation that is toxic to cells (Richter et al., 2010;  
66 Somero et al., 2017). To combat these effects, nearly all living organisms possess a  
67 conserved set of cellular responses—collectively referred to as the heat shock response  
68 or cellular stress response—which are characterized by rapid shifts in the expression of  
69 hundreds to thousands of gene loci (Gasch et al., 2000; Leemans et al., 2000; Buckley  
70 et al., 2006; Lockwood et al., 2010; Brown et al., 2014). A key component of the heat  
71 shock response is the dramatic induction of genes that encode heat shock proteins  
72 (HSPs), while the majority of the rest of the proteome ceases to be expressed (Tissi eres  
73 et al., 1974; Mirault et al., 1978; Lindquist, 1981; Hofmann and Somero, 1996; Tomanek  
74 and Somero, 1999; Tomanek and Zuzow, 2010). HSPs function as molecular  
75 chaperones that bind, sequester, and help refold thermally denatured proteins (Richter  
76 et al., 2010), providing thermal protection at the molecular level that scales up the whole  
77 organism. Indeed, sublethal thermal exposures that induce the heat shock response  
78 allow organisms to survive more extreme subsequent thermal exposures that would  
79 otherwise be lethal (Arrigo, 1987; Feder et al., 1996). Transgenic overexpression of  
80 HSPs confers increased whole-organism thermal tolerance (Welte et al., 1993; Feder et  
81 al., 1996), and the expression of HSPs has been shown to be adaptive under conditions  
82 of heat stress, as laboratory selection to high temperatures leads to higher expression  
83 of HSPs (Rudolph et al., 2010). In addition, many populations and species that live in  
84 environments characterized by frequent, acute exposures to extreme heat, have  
85 evolved higher expression of HSPs than closely related species that inhabit more  
86 benign thermal environments (Hofmann and Somero, 1996; Tomanek and Somero,  
87 2000; Dong et al., 2008; Lockwood et al., 2010; Schoville et al., 2012; Dilly et al., 2012).  
88 Despite the broad evolutionary conservation of the heat shock response across  
89 taxa (K ultz, 2005; Somero et al., 2017), animals in the earliest life stages have vastly  
90 reduced heat shock responses (Graziosi et al., 1980; Welte et al., 1993) due to the low  
91 transcriptional activity of early zygotes (Tadros and Lipshitz, 2009). This poses a  
92 challenge to oviparous species with external embryonic development. Early embryos of  
93 these organisms are directly exposed to the thermal environment and may have little  
94 opportunity to express protective proteins from their own genomes. Rather, their  
95 mechanisms for coping with thermally-induced molecular damage are limited to the  
96 molecular factors (i.e., RNAs, protein, and organic osmolytes) that are loaded into eggs  
97 by mothers (Wieschaus, 1996). Indeed, previous studies have shown early embryonic  
98 stages to be more thermally sensitive than later stages (Walter et al., 1990; Welte et al.,  
99 1993).  
100 Given that maternal oogenesis establishes the early embryonic transcriptome  
101 and proteome (Sch upbach and Wieschaus, 1986; Wieschaus, 1996; Tadros and  
102 Lipshitz, 2009), maternal molecular factors are likely to be a major determinant of  
103 developmental robustness and survival in the face of variable thermal environments.

104 However, few studies have characterized the molecular roles of maternal effects in the  
105 context of embryonic thermal tolerance (Sato et al., 2015). In fruit flies (*Drosophila*  
106 *melanogaster*), the early time window of minimal zygotic transcriptional activity spans  
107 the first 2 hours of development, after which zygotic transcription begins to predominate  
108 over the maternally provided pool of mRNAs (Blythe and Wieschaus, 2015a).  
109 Consequently, 4-h-old embryos are more heat tolerant than earlier stages (Walter et al.,  
110 1990), and by 14 h post-fertilization (Welte et al., 1993) embryos attain approximately  
111 the same degree of thermal tolerance that they possess later on as larvae, pupae, and  
112 adults (Huey et al., 1991; Feder et al., 1997).

113 Among the mRNAs that are loaded into eggs by *D. melanogaster* mothers,  
114 messages that encode members of the small heat shock protein (sHSP) family are  
115 highly abundant, with two sHsps being among the top 1% of most highly abundant  
116 transcripts in the early embryo (see Fig. 1)(Pauli et al., 1989; Michaud and Tanguay,  
117 2003; Brown et al., 2014; Morrow and Tanguay, 2015). Genes encoding this class of  
118 proteins are also among the most highly expressed genes following heat stress in  
119 larvae, pupae, and adults (Berger and Woodward, 1983; Ayme and Tissières, 1985;  
120 Horwitz, 1992; Brown et al., 2014). sHSPs are a family of molecular chaperones that  
121 serve a wide-range of molecular functions, including stabilizing major cellular structural  
122 components like the cytoskeleton (Leicht et al., 1986; Horwitz et al., 1992) and the cell  
123 membrane (Tsvetkova et al., 2002; Horváth et al., 2008). Thus, the maternal  
124 contribution of these proteins may be a critical factor in maintaining embryonic  
125 development of offspring in both benign thermal conditions and in the presence of  
126 thermal stress.

127 Here, we establish a role for maternal effects in conferring embryonic thermal  
128 tolerance in *D. melanogaster* via maternal loading of the sHSP gene *Hsp23*, which is a  
129 major component of the heat shock response. We report that among sHSP genes,  
130 *Hsp23* is unique in that it is a major component of the adult heat shock response but  
131 only present at low abundance in early embryos. Further, by driving overexpression of  
132 this gene in female oocytes, we observed marked increases in thermal tolerance in  
133 offspring embryos and lasting effects that influenced larval performance—both of which  
134 were significant maternal effects. Overall, our results demonstrate that single genes of  
135 large effect can contribute significantly to whole-organism phenotypes, such as thermal  
136 tolerance, and that maternal loading of mRNAs can influence not only early embryonic  
137 development but also larval performance later in life.

138

## 139 MATERIALS AND METHODS

140

### 141 modENCODE expression data

142 modENCODE is a collaborative project that generated transcriptomic data from RNA-  
143 sequencing (RNA-Seq) across life stages and in response environmental stressors in *D.*  
144 *melanogaster* (Brown et al., 2014). Expression data were downloaded from FlyBase  
145 (Attrill et al., 2016) and consist of mRNA levels (expressed as reads per kilobase of  
146 transcript per million mapped reads: RPKM) of 18,029 unique transcripts. Among these  
147 transcripts, we used nonlinear least-squares regression fitting to compare mRNA levels  
148 in early embryos (0-2 h post-fertilization) and 4 d-old heat-shocked adults (36°C for 1 h),  
149 with Robust regression and Outlier removal (ROUT) analysis (Motulsky and Brown,  
150 2006) to identify outliers.

151

### 152 Fly stocks

153 To assess the effects of targeted overexpression and increased maternal loading of  
154 *Hsp23* in early embryos, we used the Gal4-UAS system (Brand and Perrimon, 1993;  
155 Duffy, 2002) in a two-step crossing scheme (Fig. 2A). First, we used a female germline  
156 Gal4 driver, *MTD-Gal4* (Bloomington Stock—BL#: 31777), crossed with *UAS-Hsp23*  
157 (BL#: 30541) to cause *Hsp23* overexpression in female ovaries (*Hsp23*<sup>OE</sup>). These  
158 constructs when brought together in a genetic cross drive overexpression of the target  
159 gene (*Hsp23*) in female ovaries and were chosen to modify the levels of *Hsp23* mRNAs  
160 that are loaded into eggs. Second, we tested the effects of this overexpression  
161 construct in early embryos by comparing the phenotypes of 0-1 h-old offspring embryos  
162 from reciprocal crosses between the *Hsp23*<sup>OE</sup> and the control genotype (*w*<sup>1118</sup>) that  
163 switched the female and male genotypes, such that embryos from one cross (female  
164 *Hsp23*<sup>OE</sup> x male *w*<sup>1118</sup>) had mothers that overexpressed *Hsp23* and embryos from the  
165 other cross (female *w*<sup>1118</sup> x male *Hsp23*<sup>OE</sup>) were genetically similar but had control  
166 mothers with wildtype *Hsp23* expression. The control genetic background was *w*<sup>1118</sup>  
167 (BL#: 5905), which was the original strain used to generate the *UAS-Hsp23* transgenic  
168 line. We note that the *MTD-Gal4* strain was generated in the *w*<sup>\*</sup> genetic background.  
169 Therefore, F2 offspring of *Hsp23*<sup>OE</sup> mothers received mitochondria from *w*<sup>\*</sup>, whereas  
170 offspring from the reciprocal cross received mitochondria from *w*<sup>1118</sup>. While these  
171 represent two distinct mtDNA genetic backgrounds, many lab stocks were originally  
172 derived from similar mitochondrial lineages and natural populations of *D. melanogaster*  
173 harbor relatively low levels of mtDNA polymorphism (Cooper et al., 2015). Thus, we  
174 interpret measurable differences in embryonic thermal tolerance among genotypes to  
175 be largely the result of differential maternal loading of *Hsp23* mRNAs, and not an artifact  
176 of mitochondrial lineage. All stocks were obtained from the Bloomington Drosophila  
177 Stock Center (Bloomington, IN) and maintained at 22°C on standard cornmeal, yeast,  
178 and agar medium.

179 We focused our experiments on the maternal effects of overexpression and  
180 increased loading of *Hsp23* and did not perform a targeted knockdown of this gene for  
181 the following reasons. First, *Hsp23* is present in such low abundance in early embryos  
182 (Table 1; Fig. 1) that knocking down the expression of this gene is likely to have little  
183 effect. Additionally, there is evidence that the more abundant sHSPs, such as *Hsp26*  
184 and *Hsp27*, compensate for the absence of *Hsp23* under heat stress conditions

185 (Bettencourt et al. 2008). Second, recent reviews of the literature suggest that, despite  
186 the preponderance of targeted gene knockdown experimental designs, many loss-of-  
187 function studies across a broad array of species have failed to produce measureable  
188 phenotypic outcomes (Gibney et al., 2013; Evans, 2015). This may be due to functional  
189 redundancy among genes or lack of assay sensitivity to characterize more subtle  
190 physiological effects (Bischof et al., 2013). Whatever the biological significance of these  
191 trends in loss-of-function studies, gain-of-function experimental designs are warranted  
192 and have led to the recent creation of comprehensive genetic resources for targeted  
193 gene over-expression (Bischof et al., 2013). Third, we predicted that overexpression  
194 and increased maternal loading of *Hsp23* into early embryos would more closely  
195 phenocopy the higher thermal tolerance of later stages of development that possess an  
196 enhanced ability, relative to early embryos, to induce the high levels of expression of  
197 heat shock genes, including *Hsp23* (Fig. 1).

198

### 199 **Quantification of *Hsp23* mRNA levels**

200 We extracted total RNA from separate pooled batches of 20 - 100 embryos (0-1 h-old)  
201 that constituted our biological replicates for quantitative PCR (qPCR). Embryos were  
202 collected from grape juice agar plates after being exposed to 22°C or 34°C for 45 min  
203 (see Embryonic thermal tolerance section below), rinsed in 1x PBS, dechorionated in  
204 50% bleach for 1 min, and rinsed again in diH<sub>2</sub>O. We note that embryos were less than  
205 2 h-old, which is prior to the activation of zygotic transcription of the majority of genes  
206 (Ali-Murthy et al., 2013; Blythe and Wieschaus, 2015b). The embryos were then  
207 transferred to microcentrifuge tubes, frozen on liquid nitrogen, and stored at -80°C for  
208 up to one month prior to RNA extraction. We extracted total RNA with TRIzol (Molecular  
209 Research Center, Cincinnati, OH, USA) and Phase Lock Gel tubes (Quantabio, Beverly,  
210 MA, USA) that are designed to maintain stable separation of aqueous and organic  
211 phases. RNA quality was assessed on a NanoDrop spectrophotometer (NanoDrop  
212 products, Wilmington, DE, USA). We then removed any residual DNA with the TURBO  
213 DNA-FREE kit (Thermo Fisher Scientific, Waltham, MA, USA). We performed reverse  
214 transcriptase reactions with the SuperScript III First-Strand Synthesis kit using oligo dT  
215 primers (Thermo Fisher). qPCR was conducted with the Agilent Brilliant III Ultra-Fast  
216 SYBR Green Master Mix (Agilent Technologies, Santa Clara, CA, USA) on a Bio-Rad  
217 CFX Connect Real-Time PCR system (Bio-Rad, Hercules, CA, USA) using primer sets  
218 and reaction conditions that have been previously described (Bettencourt et al., 2008).

219 We calculated reaction efficiencies from standard curves for both the target gene  
220 (*Hsp23*) and the reference (*Act5c*), and we found the efficiencies to be identical for both  
221 genes ( $E = 1.87$ ). We chose *Act5c* as the reference gene based on previous work that  
222 has shown it to exhibit stable expression across benign and heat shock conditions  
223 (Hoekstra and Montooth, 2013). We used the efficiency value to calculate average fold-  
224 differences among experimental groups as previously described (Pfaffl, 2001). We  
225 compared relative *Hsp23* mRNA levels among experimental groups using an ANOVA of  
226  $-\Delta CT$  values, where  $\Delta CT = CT_{Hsp23} - CT_{Act5c}$ .

227

### 228 **Embryonic thermal tolerance**

229 We measured acute thermal tolerance in early embryos (0 to 1 h post-fertilization) from  
230 crosses between genotypes designed to generate overexpression or normal expression



231 (see above)(Fig. 2A). At this early stage, embryos coordinate early developmental  
232 processes via the molecular factors (i.e. RNA and protein) provided to them by their  
233 mothers (Tadros and Lipshitz, 2009; Blythe and Wieschaus, 2015a). Thus, embryonic  
234 phenotypic effects that we report on herein are largely the result of maternal effects  
235 mediated by changes in the expression of genes in female ovaries, the products of  
236 which are subsequently loaded into eggs. We chose this early stage because we sought  
237 to characterize the effects of (1) maternal mRNA contributions and (2) targeted gene  
238 overexpression in the absence of a fully developed zygotic heat-shock transcriptional  
239 response. This allowed us to better isolate and characterize the functional contribution  
240 of the transcription of a single gene (i.e. *Hsp23*) for whole-organism acute thermal  
241 tolerance, without the potentially confounding effects of large and concomitant changes  
242 in the expression of other heat shock genes.

243 We designed our temperature treatments to mimic sudden (acute) changes in  
244 temperature that frequently occur in nature where the temperature of necrotic fruit can  
245 increase rapidly on a hot day (Feder et al., 1997; Terblanche et al., 2011). 3 to 5 day-old  
246 adult flies of the appropriate genotypes were allowed to mate and lay eggs on grape  
247 juice agar plates for 1 h at 22°C. Egg plates were then wrapped in Parafilm and  
248 submerged in a water bath set to one of a range of temperatures between 22°C and  
249 40°C (22°C, 24°C, 26°C, 28°C, 30°C, 32°C, 34°C, 36°C, 38°C, or 40°C) for 45 minutes.  
250 Due to the thermal mass of the egg plates, the embryos did not immediately experience  
251 the temperature of the water bath upon immersion, but rather were exposed to a  
252 thermal ramp that averaged +0.4°C min<sup>-1</sup> among all temperatures. While this rate of  
253 change is extreme, it is within the range of maximum measured rates of change in the  
254 field (Terblanche et al., 2011). After thermal exposure, a section of the agar containing  
255 20 eggs was cut and transferred to a food vial where eggs were allowed to recover and  
256 develop at 22°C. Hatching, pupation, and eclosion success were scored as the  
257 proportion of these 20 eggs that survived to each stage. Hatching success was scored  
258 at 48 h, pupation success at 5 to 10 days, and eclosion at 10 to 15 days post-  
259 fertilization. We also scored development time as the length of time (days) to successful  
260 pupation and eclosion. Temperature treatments and phenotypic measurements were  
261 conducted on four to six vials in each of three to four separate generations for each  
262 cross type (i.e., N = 4 to 6 vials x 10 temperatures x 3 to 4 generations per genotype) for  
263 a total number of 12 to 24 biological replicates per genotype per temperature.

264 We calculated the lethal temperature at which 50% of the embryos failed to hatch,  
265 pupate, or eclose (LT<sub>50</sub>) via a least-squares logistic regression model. We allowed the y-  
266 intercept to vary between 0 and 1 and extrapolated the LT<sub>50</sub> from the inflection point of  
267 the logistic curve fit. This approach allowed us to infer thermal tolerance independently  
268 from other confounding factors that reduce hatching success, such as the presence of  
269 unfertilized eggs.

270

### 271 **Pupation height**

272 We scored the average pupation height as a measurement of larval performance  
273 (Mueller and Sweet, 1986; Hoekstra et al., 2013). Pupation height was scored  
274 subsequent to early embryonic temperature treatments (see above) at 8 to 10 days  
275 post-fertilization. Each food vial was divided into four quadrants; quadrant 1 spanned  
276 the distance from the bottom of the vial to 3.5 cm in height and quadrants 2 - 4 each

277 comprised a section of 2 cm up the height of the vial. Each pupa was scored a number  
278 between 1 and 4, corresponding to the quadrant in which it pupated. All pupae on the  
279 food were scored as 1 (quadrant 1). Average pupation height was then calculated  
280 separately for each vial.

## 281 282 **Statistics**

283 LT<sub>50</sub> values were compared by assessing the fit of the logistic regression models to  
284 each genotype separately vs. all genotypes combined via the extra sum-of-squares F-  
285 test and the Akaike's Information Criteria (AICc). The effects of temperature, treatment,  
286 and maternal genotype on development time were analyzed via ANOVA followed by  
287 Sidak's multiple comparisons test to assess pairwise differences. Pupation height was  
288 analyzed in the same manner via ANOVA and Sidak's test. All analyses were  
289 conducted in GraphPad Prism version 7 for Mac (GraphPad Software, La Jolla, CA).

## 290 291 **RESULTS**

292 Among all 18,029 transcripts included in the modENCODE dataset, mRNA levels in  
293 early embryos and heat-shocked adults were positively correlated (Fig. 1; Least-  
294 squares regression,  $R^2 = 0.17$ ,  $y = 10^{(1.002 \cdot \log(x) - 0.1344)}$ ). Among the 12 sHSP  
295 genes, mRNA levels in embryos and heat-shocked adults were also positively  
296 correlated (Fig. 1; Robust regression,  $R^2 = 0.97$ ,  $y = 10^{(0.5436 \cdot \log(x) + 1.905)}$ ), even  
297 though mRNA levels were higher in heat-shocked adults compared to embryos (Table  
298 1; Fig. 1). However, *Hsp23* was a significant outlier in this relationship (Fig. 1; ROUT  
299 outlier analysis,  $Q = 1\%$ ). Of sHSP genes, *Hsp23* has the biggest difference in  
300 expression level between early embryos and heat-shocked adults and is present at low  
301 levels in non-heat-shocked adults, with a heat-shock induction response of >100-fold  
302 (Table 1).

303 We sought to test the contribution of maternal *Hsp23* mRNAs to embryonic  
304 thermal tolerance by increasing *Hsp23* abundance in early embryos through  
305 overexpression in the maternal germline. We focused our functional genetic analyses  
306 on *Hsp23* because this gene (1) was the sole significant outlier among the sHSP genes  
307 in the relationship between early embryonic vs. heat-shocked adult gene expression  
308 (Fig. 1) and (2) showed the greatest induction in response to heat-shock in adults  
309 (Table 1). These observations suggest that *Hsp23* plays a unique role among the sHSP  
310 genes in the heat-shock response, and thus may be a key factor in conferring acute  
311 thermal tolerance.

312 Maternal genotype (*Hsp23*<sup>OE</sup> versus *w*<sup>1118</sup> control) and embryonic heat stress (45  
313 min at 34°C) both had significant effects on *Hsp23* mRNA levels in early embryos  
314 (Table 2 and Fig. 2B; ANOVA temperature effect,  $F_{1,8} = 16.45$ ,  $P = 0.0037$ , maternal  
315 genotype effect,  $F_{1,8} = 7.572$ ,  $P = 0.025$ ), and these effects were additive (ANOVA  
316 temperature x maternal genotype interaction,  $F_{1,8} = 0.2216$ ,  $P = 0.6504$ ). *Hsp23*-  
317 overexpressing females (*Hsp23*<sup>OE</sup>) laid eggs with 2.12-fold higher baseline levels of  
318 *Hsp23* mRNAs at 22°C and a 2.89-fold higher levels of *Hsp23* mRNAs following heat  
319 shock at 34°C, relative to embryos that were offspring of mothers of the control genetic  
320 background (*w*<sup>1118</sup>) (Fig. 2B). In addition, heat shock led to significant increases in the  
321 levels of *Hsp23* mRNAs regardless of maternal genotype, increasing by 4.44-fold and



322 3.26-fold (34°C relative to 22°C) in offspring embryos of (female x male) *Hsp23*<sup>OE</sup> x  
323 *w*<sup>1118</sup> and *w*<sup>1118</sup> x *Hsp23*<sup>OE</sup>, respectively (Fig. 2B).

324 Maternal overexpression of *Hsp23* significantly increased embryonic thermal  
325 tolerance by raising the lethal temperature (LT<sub>50</sub>) by approx. 1°C (Fig. 3; Extra sum of  
326 squares F-test,  $F_{1,262} = 5.371$ ,  $P = 0.02$ ). Embryos that successfully hatched also  
327 survived to pupation and adulthood, as 95-100% of larvae and pupae survived to  
328 pupation and eclosion, respectively, regardless of maternal genotype. Furthermore,  
329 there were no significant differences between the LT<sub>50</sub> of hatching, pupation, and  
330 eclosion successes for a given genotype (Fig. 3B; Extra sum of squares F-test,  $P >$   
331 0.05), suggesting that effects of early, acute thermal stress on survival were largely  
332 localized to embryogenesis.

333 In addition to the positive and protective effect of maternal *Hsp23* overexpression  
334 for whole-embryo survival of thermal stress, maternal loading of this gene in early  
335 embryos had significant effects on larval performance, as indexed by pupation height.  
336 Exposure of 0-1 h-old embryos to the brief (45 min.) episode of thermal exposure  
337 resulted in larvae with significantly reduced pupation height at the highest temperatures  
338 (Fig. 4A), which explained 22% of the variation in pupation height (Table 3; ANOVA  
339 temperature effect,  $F_{8,189} = 7.744$ ,  $P < 0.0001$ ). Maternal *Hsp23* overexpression had no  
340 significant effect on pupation height overall (Fig. 4A; Table 3; ANOVA maternal  
341 genotype effect,  $F_{1,189} = 3.674$ ,  $P = 0.0568$ ) but conferred protection against the  
342 negative effects of heat stress on pupation height, particularly at 34°C (Fig. 4A; Table 3;  
343 ANOVA temperature x maternal genotype interaction,  $F_{8,189} = 2.822$ ,  $P = 0.0056$ ,  
344 Sidak's test on pairwise difference at 34°C,  $P < 0.001$ ).

345 Embryonic heat stress also caused significant increases in development time, as  
346 indexed by the length of time (days) to pupation (Fig. 4B), in offspring of both maternal  
347 genotypes, with a trend of maternal overexpression of *Hsp23* attenuating this  
348 developmental delay (Table 3; ANOVA temperature effect,  $F_{8,169} = 9.605$ ,  $P < 0.0001$ ,  
349 maternal genotype effect,  $F_{1,169} = 2.928$ ,  $P = 0.0889$ , temperature x maternal genotype  
350 interaction,  $F_{8,169} = 0.6591$ ,  $P = 0.73$ ).

351 Embryonic heat stress also significantly affected the developmental time to adult  
352 eclosion (Fig. 4C; Table 4); however, the effect sizes were much smaller than the heat-  
353 stress-induced delay to pupation, and the pattern was largely driven by a shorter time to  
354 eclosion at 22°C (Fig. 4C; ANOVA temperature effect,  $F_{8,347} = 11.511$ ,  $P < 0.001$ ).  
355 Maternal *Hsp23* overexpression had no significant effect on time to eclosion (Fig. 4C;  
356 Table 4; ANOVA maternal genotype effect,  $F_{1,347} = 0.814$ ,  $P = 0.3676$ ), regardless of  
357 temperature (ANOVA temperature x maternal genotype interaction,  $F_{8,347} = 2.020$ ,  $P =$   
358 0.1561), sex (ANOVA sex x maternal genotype interaction,  $F_{1,347} = 0.098$ ,  $P = 0.7544$ ),  
359 or the interaction among all of these effects (ANOVA temperature x sex x maternal  
360 genotype interaction,  $F_{1,347} = 0.1091$ ,  $P = 0.7414$ ). There was a significant difference  
361 between females and males in time to eclosion across all temperatures, with females  
362 eclosing sooner than males, and sex accounted for the greatest variation in time to  
363 eclosion (Table 4; Fig. 4C; ANOVA sex effect,  $F_{1,347} = 30.263$ ,  $P < 0.00001$ ). And, while  
364 males on average suffered greater developmental delays to eclosion following acute  
365 exposure to 38°C (Fig. 4C), this effect was not significant (ANOVA temperature x sex  
366 interaction,  $F_{8,347} = 0.149$ ,  $P = 0.70$ ).

367 There was a slight discrepancy between the thermally induced delays in  
368 development to pupation vs. eclosion. Specifically, embryonic thermal stress at 34°C  
369 and 36°C caused delays in time to pupation but not eclosion (Figs. 4B and 4C). In effect,  
370 this means that the pupae that suffered developmental delays to pupation somehow  
371 recovered from this delay to be able to eclose on the same schedule as pupae that  
372 were exposed to lower embryonic temperatures. This may have occurred due to the  
373 entrainment of eclosion behavior by circadian rhythms (Kyriacou et al., 1990; Paranjpe  
374 et al., 2005), in which case delayed pupae could catch up to the eclosion schedule of  
375 other pupae, as long as the pupation was delayed by less than 24 hours. Alternatively,  
376 this pattern may be an artifact of the low sample sizes and high variance in  
377 development times that accompanied the more extreme thermal exposures, as far fewer  
378 individuals successfully hatched after exposure to the highest temperatures (Fig. 3A).  
379 But despite this incongruity between pupation and eclosion times at the highest  
380 temperatures of embryonic heat stress, overall our data indicate that overexpression of  
381 *Hsp23* in the maternal germline not only increased embryonic hatching success after  
382 exposure to heat stress, but also had persisting effects on offspring performance  
383 throughout larval development.

## 384 385 **DISCUSSION**

386 Despite over five decades of research on the heat shock response, there have  
387 been relatively few studies to connect genotype to phenotype in the context of heat  
388 shock protein expression and organismal performance (Somero et al., 2017). Here we  
389 demonstrate the direct effects of maternal loading of *Hsp23* mRNAs for offspring  
390 survival and performance following acute heat stress in a common genetic background.  
391 We found that increases in the levels of *Hsp23* in early *D. melanogaster* embryos confer  
392 significant protection from heat stress during a thermally sensitive life stage.

### 393 394 ***Hsp23* maternal loading and the embryonic heat shock response**

395 *Hsp23* overexpression in female ovaries resulted in embryos with increased  
396 abundance of *Hsp23* mRNA. Thus, the phenotypic effects of maternal genotype on  
397 whole-embryo thermal tolerance that we observed were likely the consequence of  
398 increased maternal loading that elevated basal levels of *Hsp23* in early embryos. We  
399 also observed that embryos induced the expression of *Hsp23* in response to heat shock  
400 regardless of maternal genotype, with no significant interaction between maternal  
401 genotype and temperature. Previous work has shown that the transgenic manipulation  
402 of heat shock protein 70 (*Hsp70*) gene induction in *D. melanogaster* (Welte et al., 1993)  
403 causes massive increases in the heat-induced transcription of *Hsp70* by more than 500-  
404 fold (Hoekstra and Montooth, 2013). This increase in heat-inducible *Hsp70* mRNAs  
405 translated into approximately 2.5-fold higher levels of Hsp70 protein over the time  
406 course of two hours in response to heat stress in wandering third-instar larvae, which  
407 allowed larvae to survive significantly longer at 39°C (Feder et al., 1996). In comparison,  
408 the higher levels of *Hsp23* induced by Gal4/UAS overexpression in female ovaries that  
409 we report herein were subtle. These overexpression levels were similar to previous  
410 reports of overexpression of other genes in fly ovaries that were driven by similar  
411 transgenic constructs (Dominguez et al., 2016). But regardless of the absolute degree  
412 of overexpression, the higher maternal loading of *Hsp23* increased embryonic LT<sub>50</sub> by

413 approx. 1°C, and this increase in LT<sub>50</sub> signified a substantial increase in thermal  
414 tolerance. In particular, following 45 minutes of heat stress at 34°C, 87.5% of the  
415 embryos with higher *Hsp23* levels successfully hatched, whereas only 46.7% of  
416 embryos with normal levels of *Hsp23* survived this heat treatment.

417 Beyond the aforementioned work in *D. melanogaster* (Welte et al., 1993; Feder  
418 et al., 1996) and the present study, there have been few studies to directly test the  
419 effect of heat shock protein expression on whole-organism thermal tolerance, with one  
420 study showing that targeted gene knockdown of *Hsp22* and *Hsp23* in adult *D.*  
421 *melanogaster* decreases cold tolerance (Colinet et al., 2010). A much larger body of  
422 work has used interspecies and inter-population comparisons to infer the evolutionary  
423 history of the heat shock response (Hofmann and Somero, 1996; Tomanek and Somero,  
424 2000; Dong et al., 2008; Lockwood et al., 2010; Schoville et al., 2012; Dowd and  
425 Somero, 2013; Nguyen et al., 2016) Based on these studies, it is well-established that  
426 HSP expression is an adaptive physiological mechanism for coping with acute thermal  
427 stress. Accordingly, population-level comparisons have discovered clinal variation in  
428 *Hsp23* alleles across environmental thermal gradients in *Drosophila buzzatii* in Australia  
429 (Frydenberg et al., 2010), as well as clines in allele frequencies of *Hsp23* and *Hsp26*  
430 among *D. melanogaster* populations in Australia (Frydenberg et al., 2003). In addition,  
431 laboratory thermal selection studies have found evolved changes in HSP expression to  
432 accompany adaptive shifts in upper thermal limits (Rudolph et al., 2010; Kelly et al.,  
433 2017). It is important to note, however, that increased levels of HSP expression do not  
434 always accompany thermal adaptation to higher temperatures (Zatsepina et al., 2001).  
435 In fact, experimental evolution to a higher constant temperature in *D. melanogaster* led  
436 to the evolution of lower *Hsp70* expression and concomitant decreases in acute thermal  
437 tolerance (Bettencourt et al., 1999). Thus, higher basal and inducible HSP expression  
438 may be adaptive primarily in environments that are characterized by sudden and  
439 dramatic heat stress events, rather than constant hot environments (Dong et al., 2008;  
440 Dilly et al., 2012).

441 Even though our observed genotypic effects on embryo thermal tolerance were  
442 the result of differential maternal loading of *Hsp23*, it is interesting to note that we  
443 observed zygotic induction of this gene in offspring of both maternal genotypes. At this  
444 early stage of development (0-1 h-old), zygotic genomes are predicted to be  
445 transcriptionally inactive because embryos have not undergone the maternal-to-zygotic  
446 transition (MZT) that occurs in the mid-blastula stage (approx. 2.5 h-old) in *D.*  
447 *melanogaster* (Tadros and Lipshitz, 2009; Blythe and Wieschaus, 2015a). However,  
448 prior to the canonical MZT, zygotic gene expression appears to be responsive to  
449 thermal variability. A previous analysis of protein expression in early *D. melanogaster*  
450 embryos using 2-dimensional gel electrophoresis found that heat shock proteins were  
451 heat-inducible at 1 to 2-h post-fertilization (Graziosi et al., 1980). Moreover, recent work  
452 in *D. melanogaster* has highlighted the developmental role of early zygotic gene  
453 transcription that precedes the MZT (Ali-Murthy et al., 2013), but the full extent to which  
454 the early zygotic genome responds to thermal variability warrants new investigation. In  
455 the present study, *Hsp23* expression was induced in early embryos to a much lesser  
456 extent (approx. 4-fold) than what has been previously observed in later stages of  
457 development. In fact, Leemans et al. (Leemans et al., 2000) found *Hsp23* to be heat-  
458 induced by more than 10-fold in late-stage embryos (18 h-old) and Brown et al. (Brown

459 et al., 2014) reported this gene to be heat-induced by approx. 100-fold in adults (Table  
460 1). Therefore, while embryos at the earliest stages of development appear to exhibit a  
461 heat shock response, it is at a much-reduced level compared to later stages. This  
462 explains why early embryonic stages are more thermally sensitive than later stages  
463 (Walter et al., 1990; Welte et al., 1993) and further emphasizes the potentially critical  
464 role of maternally-loaded mRNAs and proteins as thermal protectants.

465 The specific mechanism by which the Hsp23 protein confers thermal tolerance  
466 remains elusive. This protein exhibits general chaperoning activity by preventing heat  
467 denaturation of proteins in vitro (Heikkila et al., 2006), but it has also been shown to be  
468 involved in ventral furrow morphogenesis in early fly embryos under benign thermal  
469 conditions (Gong et al., 2004). This developmental role may be mediated through the  
470 interaction of Hsp23 with elements of the cytoskeleton, such as microtubules (Hughes  
471 et al., 2008) and actin microfilaments (Goldstein and Gunawardena, 2000). The  
472 cytoskeletal association of Hsp23 is further supported by the observation that this  
473 protein was the only small heat shock protein whose overexpression was observed to  
474 prevent actin-dependent contractile dysfunction in cardiomyocytes of *D. melanogaster*  
475 larvae (Zhang et al., 2011). Indeed, among the sHSPs that are highly induced in  
476 response to heat stress (Table 1), Hsp23 is the only one that is both localized to the  
477 cytoplasm (Morrow and Tanguay, 2015) and contains an actin-binding domain  
478 (sequence data not shown). Whether or not the interaction of Hsp23 with the  
479 cytoskeleton provides protection in the context of thermal stress has not been reported,  
480 but this is a worthwhile topic of future study.

481

### 482 **Effects of embryonic heat stress on post-embryonic larval development**

483 We found that the *Hsp23*-mediated maternal effect extended beyond embryonic  
484 thermal tolerance (i.e., hatching success) and attenuated heat-induced defects in larval  
485 performance (i.e., pupation height) and prevented heat-induced developmental delays  
486 (i.e., days to pupation). It is surprising that a brief thermal exposure experienced during  
487 the first 2 hours of life has negative consequences that last for days to weeks,  
488 throughout larval development. Drops in pupation height and increases in development  
489 time have been previously associated with lower energetic performance and fitness  
490 (Mueller and Sweet, 1986; Montooth et al., 2010; Hoekstra et al., 2013; Meiklejohn et al.,  
491 2013), and may have important ecological consequences in natural populations.

492 The persistent effects of maternal transcript loading on larval development post-  
493 heat stress might have important consequences for the evolution of maternal effects. A  
494 recent study reported significant maternal effects that determined both acute (i.e., 1 h at  
495 27°C) and chronic (i.e., constant exposure to 24°C) thermal tolerance in offspring  
496 embryos among wild populations of *Ciona intestinalis* (Sato et al., 2015). This suggests  
497 that there is natural genetic variation for maternal effects of thermal traits in some  
498 species. However, evolutionary theory predicts that selection is less effective on alleles  
499 that confer maternal effects, compared to genes expressed in both sexes, due to a  
500 reduced effective population size (Demuth and Wade, 2007; Van Dyken and Wade,  
501 2010). Consequently, maternal effect genes can harbor higher levels of standing  
502 genetic variation, presumably because deleterious mutations are not removed as  
503 frequently from the population and these genes cannot evolve as readily via positive  
504 selection (Barker et al., 2005). Nevertheless, if maternal effects not only determine



505 hatching success but also influence larval performance and development, then the  
506 fitness consequences associated with thermal stress may lead to a greater strength of  
507 selection on maternal effect genes (i.e., greater difference in fitness among maternal  
508 effect genotypes) than would otherwise be predicted from the maternal effects of  
509 offspring hatching success alone. Because responses to natural selection depend on  
510 both the strength and the efficacy of selection, the broad developmental effects of  
511 maternal transcript loading may favor the adaptive evolution of maternal effect thermal  
512 traits, depending on the thermal environment (Chevin et al., 2010; Chevin and  
513 Hoffmann, 2016) and the underlying genetic architecture (Wolf and Wade, 2016). But to  
514 our knowledge, there have been no examples of this phenomenon reported in the  
515 literature.

516

## 517 **Conclusions**

518 Overall, our data suggest that maternal effects can have profound impacts on  
519 offspring survival and performance in the context of environmental change. The  
520 observation that differential maternal loading of mRNAs of a single gene can have  
521 lasting consequences throughout larval development, by modifying pupation height and  
522 development time, demonstrates that protective maternal effects extend well beyond the  
523 maternal-to-zygotic transcriptional transition. The role of maternal effects and the  
524 environmental stress physiology of early life stages has largely been ignored in the field  
525 of ecological physiology, but see (Sato et al., 2015). Future work is warranted in this  
526 realm, because these factors are likely be critical determinants of species responses to  
527 environmental variability (Angilletta et al., 2013; Anderson and Podrabsky, 2014;  
528 Buckley et al., 2015; Wagner and Podrabsky, 2015; Svetec et al., 2016), particularly if  
529 early life stages are most sensitive to environmental stress (Walter et al., 1990; Welte et  
530 al., 1993).

531

## 532 **Acknowledgements**

533 We thank Rosemary Scavotto and Sarah Howe for assistance with fly husbandry and  
534 Tarun Gupta for valuable discussions that aided in the preparation of the manuscript.

535

## 536 **Competing interests**

537 The authors have no competing interests.

538

## 539 **Author contributions**

540 B.L.L. and K.L.M. conceived and planned the study. B.L.L. and C.R.J. conducted the  
541 experiments. B.L.L. analyzed the data. B.L.L., C.R.J., and K.L.M. wrote the manuscript.

542

## 543 **Funding**

544 This work was supported by an NIH NRSA postdoctoral fellowship 1F32GM100669-01  
545 and funding from the University of Vermont to B.L.L. and NSF CAREER award IOS-  
546 1505247 to K.L.M.

547

## 548 **Data availability**



549 modENCODE transcript data are publicly available online at flybase.org (Gramates et  
550 al., 2017). Phenotypic data reported herein are available on the Dryad Repository,  
551 <http://>.  
552  
553

554 **References**

555

556 **Ali-Murthy, Z., Lott, S. E., Eisen, M. B. and Kornberg, T. B.** (2013). An essential role  
557 for zygotic expression in the pre-cellular *Drosophila* embryo. *PLoS Genet.* **9**,  
558 e1003428.

559 **Anderson, S. N. and Podrabsky, J. E.** (2014). The effects of hypoxia and temperature  
560 on metabolic aspects of embryonic development in the annual killifish  
561 *Austrofundulus limnaeus*. *J. Comp. Physiol. B.* **184**, 355–70.

562 **Angilletta, M. J., Zelic, M. H., Adrian, G. J., Hurliman, a. M. and Smith, C. D.** (2013).  
563 Heat tolerance during embryonic development has not diverged among populations  
564 of a widespread species (*Sceloporus undulatus*). *Conserv. Physiol.* **1**, cot018-  
565 cot018.

566 **Arrigo, A. P.** (1987). Cellular localization of HSP23 during *Drosophila* development and  
567 following subsequent heat shock. *Dev. Biol.* **122**, 39–48.

568 **Attrill, H., Falls, K., Goodman, J. L., Millburn, G. H., Antonazzo, G., Rey, A. J. and**  
569 **Marygold, S. J.** (2016). Flybase: Establishing a gene group resource for  
570 *Drosophila melanogaster*. *Nucleic Acids Res.* **44**, D786–D792.

571 **Ayme, a and Tissières, a** (1985). Locus 67B of *Drosophila melanogaster* contains  
572 seven, not four, closely related heat shock genes. *EMBO J.* **4**, 2949–54.

573 **Barker, M. S., Demuith, J. P. and Wade, M. J.** (2005). Maternal expression constraint  
574 on innovation of the anterior determinant, bicoid. *PLoS Genet.* **1**, 527–530.

575 **Berger, E. M. and Woodward, M. P.** (1983). Small Heat Shock Proteins May Confer  
576 Thermal Tolerance in *Drosophila*. *Exp. Cell. Res.* 437–442.

577 **Bettencourt, B. R., Feder, M. E., Cavicchi, S. and Selmi, F.** (1999). EXPERIMENTAL  
578 EVOLUTION OF HSP70 EXPRESSION AND THERMOTOLERANCE in *Drosophila*  
579 *melanogaster*. *Evolution (N. Y.)*. **53**, 484–492.

580 **Bettencourt, B. R., Hogan, C. C., Nimali, M. and Drohan, B. W.** (2008). Inducible and  
581 constitutive heat shock gene expression responds to modification of Hsp70 copy  
582 number in *Drosophila melanogaster* but does not compensate for loss of  
583 thermotolerance in Hsp70 null flies. *BMC Biol.* **6**, 5.

584 **Bischof, J., Bjorklund, M., Furger, E., Schertel, C., Taipale, J. and Basler, K.** (2013).  
585 A versatile platform for creating a comprehensive UAS-ORFeome library in  
586 *Drosophila*. *Development* **140**, 2434–2442.

587 **Blythe, S. A. and Wieschaus, E. F.** (2015a). Coordinating Cell Cycle Remodeling with  
588 Transcriptional Activation at the *Drosophila* MBT. *Curr. Top. Dev. Biol.* **113**, 113–  
589 148.

590 **Blythe, S. A. and Wieschaus, E. F.** (2015b). Zygotic genome activation triggers the  
591 DNA replication checkpoint at the midblastula transition. *Cell* **160**, 1169–1181.

592 **Brand, A. H. and Perrimon, N.** (1993). Targeted gene expression as a means of  
593 altering cell fates and generating dominant phenotypes. *Development* **118**, 401–  
594 415.

595 **Brown, J. B., Boley, N., Eisman, R., May, G. E., Stoiber, M. H., Duff, M. O., Booth, B.**  
596 **W., Wen, J., Park, S., Suzuki, A. M., et al.** (2014). Diversity and dynamics of the  
597 *Drosophila* transcriptome. *Nature* **512**, 1–7.

598 **Buckley, L. B. and Huey, R. B.** (2016). How Extreme Temperatures Impact Organisms  
599 and the Evolution of their Thermal Tolerance. *Integr. Comp. Biol.* 1–12.

- 600 **Buckley, B. A., Gracey, A. Y. and Somero, G. N.** (2006). The cellular response to heat  
601 stress in the goby *Gillichthys mirabilis*: a cDNA microarray and protein-level  
602 analysis. *J. Exp. Biol.* **209**, 2660.
- 603 **Buckley, L. B., Ehrenberger, J. C. and Angilletta, M. J.** (2015). Thermoregulatory  
604 behaviour limits local adaptation of thermal niches and confers sensitivity to climate  
605 change. *Funct. Ecol.* **29**, 1038–1047.
- 606 **Chevin, L.-M. and Hoffmann, A. A.** (2016). Evolution of phenotypic plasticity in  
607 extreme environments. *Philos. Trans. R. Soc. B Biol. Sci.* **In press**.
- 608 **Chevin, L. M., Lande, R. and Mace, G. M.** (2010). Adaptation, plasticity, and extinction  
609 in a changing environment: Towards a predictive theory. *PLoS Biol.* **8**.
- 610 **Colinet, H., Lee, S. F. and Hoffmann, A.** (2010). Knocking down expression of Hsp22  
611 and Hsp23 by RNA interference affects recovery from chill coma in *Drosophila*  
612 *melanogaster*. *J. Exp. Biol.* **213**, 4146–4150.
- 613 **Cooper, B. S., Burrus, C. R., Ji, C., Hahn, M. W. and Montooth, K. L.** (2015). Similar  
614 Efficacies of Selection Shape Mitochondrial and Nuclear Genes in Both *Drosophila*  
615 *melanogaster* and *Homo sapiens*. *G3 Genes, Genomes, Genet.* **5**, 2165–2176.
- 616 **Demuth, J. P. and Wade, M. J.** (2007). Maternal expression increases the rate of  
617 bicoid evolution by relaxing selective constraint. *Genetica* **129**, 37–43.
- 618 **Denny, M. W., Dowd, W. W., Bilir, L. and Mach, K. J.** (2011). Spreading the risk:  
619 Small-scale body temperature variation among intertidal organisms and its  
620 implications for species persistence. *J. Exp. Mar. Bio. Ecol.* **400**, 175–190.
- 621 **Dilly, G. F., Young, C. R., Lane, W. S., Pangilinan, J. and Girguis, P. R.** (2012).  
622 Exploring the limit of metazoan thermal tolerance via comparative proteomics:  
623 thermally induced changes in protein abundance by two hydrothermal vent  
624 polychaetes. *Proc. Biol. Sci.* **279**, 3347–56.
- 625 **Dominguez, C., Zuniga, A., Hanna, P., Hodar, C., Gonzalez, M. and Cambiazo, V.**  
626 (2016). Target genes of Dpp/BMP signaling pathway revealed by transcriptome  
627 profiling in the early *D. melanogaster* embryo. *Gene* **591**, 191–200.
- 628 **Dong, Y., Miller, L. P., Sanders, J. G. and Somero, G. N.** (2008). Heat-shock protein  
629 70 (Hsp70) expression in four limpets of the genus *Lottia*: interspecific variation in  
630 constitutive and inducible synthesis correlates with in situ exposure to heat stress.  
631 *Biol Bull* **215**, 173–181.
- 632 **Dowd, W. W. and Somero, G. N.** (2013). Behavior and survival of *Mytilus* congeners  
633 following episodes of elevated body temperature in air and seawater. *J. Exp. Biol.*  
634 **216**, 502–14.
- 635 **Dowd, W. W., King, F. A. and Denny, M. W.** (2015). Thermal variation, thermal  
636 extremes and the physiological performance of individuals. *J. Exp. Biol.* **218**, 1956–  
637 1967.
- 638 **Duffy, J. B.** (2002). GAL4 system in *Drosophila*: a fly geneticist’s Swiss army knife.  
639 *genesis* **34**, 1–15.
- 640 **Evans, T. G.** (2015). Considerations for the use of transcriptomics in identifying the  
641 “genes that matter” for environmental adaptation. *J. Exp. Biol.* **218**, 1925–1935.
- 642 **Feder, M. E., Cartano, N. V., Milos, L., Krebs, R. A. and Lindquist, S. L.** (1996).  
643 Effect of engineering Hsp70 copy number on Hsp70 expression and tolerance of  
644 ecologically relevant heat shock in larvae and pupae of *Drosophila melanogaster*. *J.*  
645 *Exp. Biol.* **199**, 1837–1844.

- 646 **Feder, M. E., Blair, N. and Figueras, H.** (1997). Natural thermal stress and heat shock  
647 protein expression in *Drosophila* larvae and pupae. *Funct. Ecol.* **11**, 90–100.
- 648 **Frydenberg, J., Hoffmann, A. and Loeschcke, V.** (2003). DNA sequence variation  
649 and latitudinal associations in hsp23, hsp26 and hsp27 from natural populations of  
650 *Drosophila melanogaster*. *Mol. Ecol.* **12**, 2025–2032.
- 651 **Frydenberg, J., Barker, J. S. F. and Loeschcke, V.** (2010). Characterization of the  
652 shsp genes in *Drosophila buzzatii* and association between the frequency of Valine  
653 mutations in hsp23 and climatic variables along a longitudinal gradient in Australia.  
654 *Cell Stress Chaperones* **15**, 271–280.
- 655 **Gasch, A. P., Spellman, P. T., Kao, C. M., Carmel-Harel, O., Eisen, M. B., Storz, G.,  
656 Botstein, D., Brown, P. O. and Anonymous** (2000). Genomic expression  
657 programs in the response of yeast cells to environmental changes. *Mol. Biol. Cell*  
658 **11**, 4241–4257.
- 659 **Gibney, P. A., Lu, C., Caudy, A. A., Hess, D. C. and Botstein, D.** (2013). Yeast  
660 metabolic and signaling genes are required for heat-shock survival and have little  
661 overlap with the heat-induced genes. *Proc. Natl. Acad. Sci.* **110**, E4393–E4402.
- 662 **Goldstein, L. S. B. and Gunawardena, S.** (2000). Flying Through the *Drosophila*  
663 Cytoskeletal Genome. *J. Cell Biol.* **150**, 63–68.
- 664 **Gong, L., Puri, M., Unlü, M., Young, M., Robertson, K., Viswanathan, S.,  
665 Krishnaswamy, A., Dowd, S. R. and Minden, J. S.** (2004). *Drosophila* ventral  
666 furrow morphogenesis: a proteomic analysis. *Development* **131**, 643–56.
- 667 **Gramates, L. S., Marygold, S. J., Dos Santos, G., Urbano, J. M., Antonazzo, G.,  
668 Matthews, B. B., Rey, A. J., Tabone, C. J., Crosby, M. A., Emmert, D. B., et al.**  
669 (2017). FlyBase at 25: Looking to the future. *Nucleic Acids Res.* **45**, D663–D671.
- 670 **Graziosi, G., Micali, F., Marzari, R., de Cristini, F. and Savoini, A.** (1980). Variability  
671 of response of early *Drosophila* embryos to heat shock. *J. Exp. Zool.* **214**, 141–145.
- 672 **Heikkila, J. J., Tanguay, R. M., Morrow, G., Heikkila, J. J. and Tanguay, R. M.**  
673 (2006). Differences in the chaperone-like activities of the four main small heat  
674 shock proteins of *Drosophila melanogaster*. *Cell Stress Chaperones* **11**, 51–60.
- 675 **Hoekstra, L. a and Montooth, K. L.** (2013). Inducing extra copies of the Hsp70 gene in  
676 *Drosophila melanogaster* increases energetic demand. *BMC Evol. Biol.* **13**, 68.
- 677 **Hoekstra, L. A., Siddiq, M. A. and Montooth, K. L.** (2013). Pleiotropic Effects of a  
678 Mitochondrial-Nuclear Incompatibility Depend upon the Accelerating Effect of  
679 Temperature in *Drosophila*. *Genetics* **195**, 1129–1139.
- 680 **Hofmann, G. E. E. and Somero, G. N. N.** (1996). Interspecific variation in thermal  
681 denaturation of proteins in the congeneric mussels *Mytilus trossulus* and *M.*  
682 *galloprovincialis*: evidence from the heat-shock response and protein ubiquitination.  
683 *Mar. Biol.* **126**, 65–75.
- 684 **Horváth, I., Multhoff, G., Sonnleitner, A. and Vigh, L.** (2008). Membrane-associated  
685 stress proteins: More than simply chaperones. *Biochim. Biophys. Acta - Biomembr.*  
686 **1778**, 1653–1664.
- 687 **Horwitz, J.** (1992). Alpha-crystallin can function as a molecular chaperone. *Proc. Natl.*  
688 *Acad. Sci. United States Am.* **89**, 10449–10453.
- 689 **Horwitz, J., Emmons, T. and Takemoto, L.** (1992). The ability of lens alpha crystallin  
690 to protect against heat-induced aggregation is age-dependent. *Curr Eye Res* **11**,  
691 817–822.

- 692 **Huey, R. B., Patridge, L. and Fowler, K.** (1991). Thermal sensitivity of *Drosophila*  
693 *melanogaster* responds rapidly to laboratory natural selection. *Evolution (N. Y.)* **45**,  
694 751–756.
- 695 **Hughes, J. R., Meireles, A. M., Fisher, K. H., Garcia, A., Antrobus, P. R., Wainman,**  
696 **A., Zitzmann, N., Deane, C., Ohkura, H. and Wakefield, J. G.** (2008). A  
697 microtubule interactome: Complexes with roles in cell cycle and mitosis. *PLoS Biol.*  
698 **6**, 785–795.
- 699 **Kelly, M. W., Pankey, M. S., DeBiase, M. B. and Plachetzki, D. C.** (2017).  
700 Adaptation to heat stress reduces phenotypic and transcriptional plasticity in a  
701 marine copepod. *Funct. Ecol.* **31**, 398–406.
- 702 **Kültz, D.** (2005). Molecular and evolutionary basis of the cellular stress response. *Annu.*  
703 *Rev. Physiol.* **67**, 225–257.
- 704 **Kyriacou, C. P., Oldroyd, M., Wood, J., Sharp, M. and Hill, M.** (1990). Clock  
705 mutations alter developmental timing in *Drosophila*. *Heredity (Edinb.)* **64**, 395–401.
- 706 **Leemans, R., Egger, B., Loop, T., Kammermeier, L., He, H., Hartmann, B., Certa, U.,**  
707 **Hirth, F. and Reichert, H.** (2000). Quantitative transcript imaging in normal and  
708 heat-shocked *Drosophila* embryos by using high-density oligonucleotide arrays.  
709 *Proc Natl Acad Sci U S A* **97**, 12138–12143.
- 710 **Leicht, B. G., Biessmann, H., Palter, K. B. and Bonner, J. J.** (1986). Small heat  
711 shock proteins of *Drosophila* associate with the cytoskeleton. *Proc. Natl. Acad. Sci.*  
712 **83**, 90.
- 713 **Lindquist, S. L.** (1981). Regulation of protein synthesis during heat shock. *Nature* **293**,  
714 311–314.
- 715 **Lockwood, B. L., Sanders, J. G. and Somero, G. N.** (2010). Transcriptomic  
716 responses to heat-stress in invasive and native blue mussels (genus *Mytilus*):  
717 molecular correlates of invasive success. *J. Exp. Biol.* **213**, 3548–3558.
- 718 **Meiklejohn, C. D., Holmbeck, M. A., Siddiq, M. A., Abt, D. N., Rand, D. M. and**  
719 **Montooth, K. L.** (2013). An Incompatibility between a Mitochondrial tRNA and Its  
720 Nuclear-Encoded tRNA Synthetase Compromises Development and Fitness in  
721 *Drosophila*. *PLoS Genet.* **9**,.
- 722 **Michaud, S. and Tanguay, R. M.** (2003). Expression of the Hsp23 chaperone during  
723 *Drosophila* embryogenesis: association to distinct neural and glial lineages. *BMC*  
724 *Dev. Biol.* **3**, 9.
- 725 **Mirault, M.-E., Goldschmidt-Clermont, M., Moran, L., Arrigo, A. P. and Tissières, A.**  
726 (1978). The effect of heat shock on gene expression in *Drosophila melanogaster*.  
727 *Cold Spring Harb. Symp. Quant. Biol.* **42**, 819–827.
- 728 **Montooth, K. L., Meiklejohn, C. D., Abt, D. N. and Rand, D. M.** (2010). Mitochondrial-  
729 Nuclear Epistasis Affects Fitness Within Species but Does Not Contribute to Fixed  
730 Incompatibilities Between Species of *Drosophila*. *Evolution (N. Y.)* **64**, 3364–3379.
- 731 **Morrow, G. and Tanguay, R. M.** (2015). *Drosophila* small heat shock proteins: an  
732 update on their features and functions. In *The Big Book on Small Heat Shock*  
733 *Proteins* (ed. Tanguay, R. M.) and Hightower, L. E.), pp. 579–606. Springer  
734 International.
- 735 **Motulsky, H. J. and Brown, R. E.** (2006). Detecting outliers when fitting data with  
736 nonlinear regression - a new method based on robust nonlinear regression and the  
737 false discovery rate. *BMC Bioinformatics* **7**, 123.



- 738 **Mueller, L. D. and Sweet, V. F.** (1986). Density-dependent natural selection in  
739 *Drosophila*: evolution of pupation height. *Evolution* (N. Y). **40**, 1354–1356.
- 740 **Nguyen, A. D., Gotelli, N. J. and Cahan, S. H.** (2016). The evolution of heat shock  
741 protein sequences, cis-regulatory elements, and expression profiles in the eusocial  
742 Hymenoptera. *BMC Evol. Biol.* **16**, 1–13.
- 743 **Paranjpe, D. a, Anitha, D., Chandrashekar, M. K., Joshi, A. and Sharma, V. K.**  
744 (2005). Possible role of eclosion rhythm in mediating the effects of light-dark  
745 environments on pre-adult development in *Drosophila melanogaster*. *BMC Dev.*  
746 *Biol.* **5**, 5.
- 747 **Pauli, D., Arrigo, A. P., Vazquez, J., Tonka, C. H. and Tissières, A.** (1989).  
748 Expression of the small heat shock genes during *Drosophila* development:  
749 comparison of the accumulation of hsp23 and hsp27 mRNAs and polypeptides.  
750 *Genome / Natl. Res. Counc. Canada = G{é}nome / Cons. Natl. Rech. Canada* **31**,  
751 671–676.
- 752 **Pfaffl, M. W.** (2001). A new mathematical model for relative quantification in real-time  
753 RT-PCR. *Nucleic Acids Res.* **29**, e45–e45.
- 754 **Richter, K., Haslbeck, M. and Buchner, J.** (2010). The Heat Shock Response: Life on  
755 the Verge of Death. *Mol. Cell* **40**, 253–266.
- 756 **Rudolph, B., Gebendorfer, K. M., Buchner, J. and Winter, J.** (2010). Evolution of  
757 *Escherichia coli* for Growth at High Temperatures. *J. Biol. Chem.* **285**, 19029–  
758 19034.
- 759 **Sato, A., Kawashima, T., Fujie, M., Hughes, S., Satoh, N. and Shimeld, S. M.** (2015).  
760 Molecular basis of canalization in an ascidian species complex adapted to different  
761 thermal conditions. *Sci. Rep.* **5**, 1–9.
- 762 **Schoville, S. D., Barreto, F. S., Moy, G. W., Wolff, A. and Burton, R. S.** (2012).  
763 Investigating the molecular basis of local adaptation to thermal stress: population  
764 differences in gene expression across the transcriptome of the copepod *Tigriopus*  
765 *californicus*. *BMC Evol. Biol.* **12**, 170.
- 766 **Schüpbach, T. and Wieschaus, E.** (1986). Maternal-effect mutations altering the  
767 anterior-posterior pattern of the *Drosophila* embryo. *Dev. Genes Evol.* **195**, 302–  
768 317.
- 769 **Somero, G. N., Lockwood, B. L. and Tomanek, L.** (2017). *Biochemical Adaptation:*  
770 *Response to Environmental Challenges from Life's Origins to the Anthropocene.*  
771 Sunderland, MA: Sinauer Associates.
- 772 **Svetec, N., Cridland, J. M., Zhao, L. and Begun, D. J.** (2016). The Adaptive  
773 Significance of Natural Genetic Variation in the DNA Damage Response of  
774 *Drosophila melanogaster*. *PLOS Genet.* **12**, e1005869.
- 775 **Tadros, W. and Lipshitz, H. D.** (2009). The maternal-to-zygotic transition: a play in two  
776 acts. *Development* **136**, 3033–42.
- 777 **Terblanche, J. S., Hoffmann, A. A., Mitchell, K. A., Rako, L., le Roux, P. C. and**  
778 **Chown, S. L.** (2011). Ecologically relevant measures of tolerance to potentially  
779 lethal temperatures. *J. Exp. Biol.* **214**, 3713–3725.
- 780 **Tissières, A., Mitchell, H. K. and Tracy, U. M.** (1974). Protein synthesis in salivary  
781 glands of *Drosophila melanogaster*. Relation to chromosome puffs. *J. Mol. Biol.* **84**,  
782 389–398.
- 783 **Tomanek, L. and Somero, G. N.** (1999). Evolutionary and acclimation-induced

- 784 variation in the heat-shock responses of congeneric marine snails (genus *Tegula*)  
785 from different thermal habitats: implications for limits of thermotolerance and  
786 biogeography. *J Exp Biol* **202**, 2925–2936.
- 787 **Tomanek, L. and Somero, G. N.** (2000). Time course and magnitude of synthesis of  
788 heat-shock proteins in congeneric marine snails (Genus *tegula*) from different tidal  
789 heights. *Physiol Biochem Zool* **73**, 249–256.
- 790 **Tomanek, L. and Zuzow, M. J.** (2010). The proteomic response of the mussel  
791 congeners *Mytilus galloprovincialis* and *M. trossulus* to acute heat stress:  
792 implications for thermal tolerance limits and metabolic costs of thermal stress. *J.*  
793 *Exp. Biol.* **213**, 3559–3574.
- 794 **Tsvetkova, N. M., Horváth, I., Török, Z., Wolkers, W. F., Balogi, Z., Shigapova, N.,**  
795 **Crowe, L. M., Tablin, F., Vierling, E., Crowe, J. H., et al.** (2002). Small heat-  
796 shock proteins regulate membrane lipid polymorphism. *Proc. Natl. Acad. Sci. U. S.*  
797 *A.* **99**, 13504–13509.
- 798 **Van Dyken, J. D. and Wade, M. J.** (2010). The genetic signature of conditional  
799 expression. *Genetics* **184**, 557–570.
- 800 **Wagner, J. T. and Podrabsky, J. E.** (2015). Extreme tolerance and developmental  
801 buffering of UV-C induced DNA damage in embryos of the annual killifish  
802 *Austrofundulus limnaeus*. *J. Exp. Zool. A. Ecol. Genet. Physiol.* **323**, 10–30.
- 803 **Walter, M. F., Biessmann, H. and Petersen, N. S.** (1990). Heat shock causes the  
804 collapse of the intermediate filament cytoskeleton in *Drosophila* embryos. *Dev.*  
805 *Genet.* **11**, 270–279.
- 806 **Welte, M. A., Tetrault, J. M., Dellavalle, R. I. P. and Lindquist, S. L.** (1993). A new  
807 method for manipulating transgenes: engineering heat tolerance in a complex,  
808 multicellular organism. *Curr. Biol.* **3**, 842–853.
- 809 **Wieschaus, E.** (1996). Embryonic transcription and the control of developmental  
810 pathways. *Genetics* **142**, 5–10.
- 811 **Wolf, J. and Wade, M.** (2016). The evolutionary genetics of maternal effects. *Evolution*  
812 (*N. Y.*).
- 813 **Zatsepina, O. G., Velikodvorskaia, V. V, Molodtsov, V. B., Garbuz, D., Lerman, D.**  
814 **N., Bettencourt, B. R., Feder, M. E. and Evgenev, M. B.** (2001). A *Drosophila*  
815 *melanogaster* strain from sub-equatorial Africa has exceptional thermotolerance but  
816 decreased Hsp70 expression. *J. Exp. Biol.* **204**, 1869–1881.
- 817 **Zhang, D., Ke, L., Mackovicova, K., Der Want, J. J. L. Van, Sibon, O. C. M.,**  
818 **Tanguay, R. M., Morrow, G., Henning, R. H., Kampinga, H. H. and Brundel, B. J.**  
819 **J. M.** (2011). Effects of different small HSPB members on contractile dysfunction  
820 and structural changes in a *Drosophila melanogaster* model for Atrial Fibrillation. *J.*  
821 *Mol. Cell. Cardiol.* **51**, 381–389.
- 822

823 **Tables**

824

825 **Table 1.** mRNA levels of sHSP genes in 5 day-old adults, 0-2 h-old embryos, and in  
 826 response to heat-shock (4 day-old adults at 36°C for 1 h). Data are expressed as mean  
 827 expression values (RPKM) and are ordered according to expression levels in heat-  
 828 shocked adults. Data are from modENCODE (Brown et al. 2014).

829

| CG number | Gene Name      | Adult Male<br>(5 d) | Adult Female<br>(5 d) | Embryo<br>(0-2 h) | Heat-shock<br>(Adult - 4 d) |
|-----------|----------------|---------------------|-----------------------|-------------------|-----------------------------|
| CG4183    | <i>Hsp26</i>   | 134                 | 751                   | 1276              | 3792                        |
| CG4466    | <i>Hsp27</i>   | 57                  | 224                   | 515               | 2689                        |
| CG4463    | <i>Hsp23</i>   | 43                  | 13                    | 25                | 2604                        |
| CG4460    | <i>Hsp22</i>   | 18                  | 7                     | 15                | 635                         |
| CG4533    | <i>l(2)efl</i> | 209                 | 63                    | 2                 | 257                         |
| CG14207   | -              | 115                 | 55                    | 50                | 219                         |
| CG7409    | -              | 421                 | 84                    | 0                 | 76                          |
| CG4190    | <i>Hsp67Bc</i> | 3                   | 0                     | 0                 | 48                          |
| CG4461    | -              | 304                 | 66                    | 0                 | 43                          |
| CG4167    | <i>Hsp67Ba</i> | 1                   | 0                     | 0                 | 16                          |
| CG13133   | -              | 8                   | 1                     | 0                 | 1                           |
| CG43851   | -              | 4                   | 0                     | 0                 | 1                           |

830

831

832

833

834

835 **Table 2.** Analysis of variance of relative *Hsp23* mRNA levels ( $\Delta CT = CT_{Hsp23} - CT_{Act5c}$ )  
 836 among maternal genotypes (*Hsp23<sup>OE</sup>* vs. *w<sup>1118</sup>*) and embryonic heat stress  
 837 temperatures (22°C vs. 34°C).

838

| Source of variation   | SS    | DF | MS    | F (1,8) | % of total<br>variation | P-value |
|-----------------------|-------|----|-------|---------|-------------------------|---------|
| Temperature           | 11.88 | 1  | 11.88 | 16.45   | 43.54                   | 0.0037  |
| Maternal genotype     | 5.467 | 1  | 5.467 | 7.572   | 20.04                   | 0.025   |
| Temp. x Mat. genotype | 0.16  | 1  | 0.16  | 0.2216  | 0.59                    | 0.65    |
| Residual              | 5.776 | 8  | 0.722 |         |                         |         |

839  
840  
841  
842  
843  
844

**Table 3.** Percent of total variation explained by the main effects of embryonic heat stress temperature, maternal genotype, and their interaction on pupation height and days to pupation (Two-way ANOVA). *P*-values are indicated in parentheses and significant effects are indicated in italics.

| Trait            | Temperature                 | Maternal genotype | Temp. x Mat. gen.     |
|------------------|-----------------------------|-------------------|-----------------------|
| Pupation height  | <i>21.63% (&lt; 0.0001)</i> | 1.28% (0.0568)    | <i>7.88% (0.0056)</i> |
| Days to pupation | <i>28.97% (&lt; 0.0001)</i> | 1.10% (0.0889)    | 1.99% (0.73)          |

845  
846  
847  
848  
849  
850  
851  
852

**Table 4.** Percent of total variation explained by the main effects of embryonic heat stress temperature, maternal genotype, sex, and their interaction on days to adult eclosion (3-way ANOVA). *P*-values are indicated in parentheses and significant effects are indicated in italics.

| Source of variation        | % Variation explained ( <i>P</i> -value) |
|----------------------------|------------------------------------------|
| Temperature                | <i>2.94% (&lt; 0.001)</i>                |
| Maternal genotype          | 0.21% (0.3676)                           |
| Sex                        | <i>7.72% (&lt; 0.00001)</i>              |
| Temp. x Mat. genotype      | 0.52% (0.1561)                           |
| Temp. x Sex                | 0.038% (0.70)                            |
| Mat. genotype x Sex        | 0.025% (0.7544)                          |
| Temp x Mat. genotype x Sex | 0.028% (0.7414)                          |

853  
854  
855  
856

857 **Figure legends**

858

859 **Figure 1. Relationship between transcriptomes and sHSP mRNA levels in early**  
860 **embryos vs. heat-shocked adults.** Data represent 18,029 unique transcripts and are  
861 expressed as mean expression values (RPKM) on a log<sub>2</sub>-scale of 0-2 hour-old embryos  
862 and 4 day-old adults (males and females pooled). Transcripts encoding small heat  
863 shock proteins (sHSPs) are shown in blue triangles, *Hsp23* highlighted in red, and all  
864 other transcripts are shown in grey circles. The solid black line (+/- 95% confidence  
865 bands in black dashed lines) represents the least-squares regression fit of all transcripts  
866 ( $R^2 = 0.17$ ,  $y = 10^{(1.002 \cdot \log(x) - 0.1344)}$ ) and the solid blue line (+/- 95% confidence  
867 bands in blue dashed lines) represents the robust regression fit of sHSP transcripts ( $R^2$   
868 = 0.97,  $y = 10^{(0.5436 \cdot \log(x) + 1.905)}$ ), for which *Hsp23* was a significant outlier (ROUT  
869 outlier analysis, Q = 1%).

870

871 **Figure 2. *Hsp23* overexpression in female ovaries increased *Hsp23* mRNA levels**  
872 **in offspring embryos.** (A) Crossing scheme used to drive overexpression of *Hsp23* in  
873 the maternal germline, thus increasing maternal loading of *Hsp23* mRNAs into offspring  
874 embryos. The genotype of each sex is indicated by the gender symbols (♀ female x ♂  
875 male). The MTD-*Gal4* construct drives overexpression of the UAS target gene (*Hsp23*)  
876 in the germline of F1 females (*Hsp23*<sup>OE</sup>♀) but not males (*Hsp23*<sup>OE</sup>♂). Reciprocal  
877 crosses between *Hsp23*<sup>OE</sup> and the control genetic background (*w*<sup>1118</sup>) produce F2  
878 embryos that possess differential levels of maternally loaded *Hsp23*, as shown in part B.  
879 (B) Relative *Hsp23* mRNA levels in early embryos, normalized to the *Act5c* reference  
880 gene for each sample, expressed as  $-\Delta CT$ , where  $\Delta CT = CT_{Hsp23} - CT_{Act5c}$ . Each data  
881 point represents a pooled batch of 50 to 100 embryos (0-1 h-old) that were exposed to  
882 the indicated temperature for 45 min. Horizontal lines indicate means among separate  
883 embryo batches and error bars indicate standard error. \* $P < 0.05$ , \*\* $P < 0.01$  (ANOVA  
884 temperature effect,  $F_{1,8} = 16.45$ ,  $P = 0.0037$ , maternal genotype effect,  $F_{1,8} = 7.572$ ,  $P =$   
885 0.025, temperature x maternal genotype interaction,  $F_{1,8} = 0.2216$ ,  $P = 0.6504$ ).

886

887 **Figure 3. Higher maternal loading of *Hsp23* mRNAs increased thermal tolerance**  
888 **of offspring embryos.** (A) Each data point represents the proportion of eggs (N = 20  
889 eggs, 0-1 h-old) that hatched following 45 minutes exposure at the indicated  
890 temperature. Lines indicate least-squares fit of the logistic equation and shaded regions  
891 indicate 95% confidence bands. (B) Mean LT<sub>50</sub> values +/- 95% confidence intervals for  
892 hatching, pupation, and eclosion success. LT<sub>50</sub> values were extrapolated from the  
893 inflection points of the logistic survival curve fits (hatching success is shown in part A),  
894 and confidence intervals represent the goodness of fit of the logistic regressions.  
895 Different letters indicate statistical significance ( $P < 0.05$ , Extra sum of squares F-test).  
896 The genotypes of the parents are indicated in the legends of both figure panels (female  
897 x male).

898

899 **Figure 4. Heat stress in early embryos caused larval defects that were**  
900 **ameliorated by maternal loading of *Hsp23*.** (A) Mean pupation height among vials (N  
901 = 18 vials), +/- 95% confidence intervals, scored at 5 to 10-days-post-fertilization  
902 following acute (45 min) early embryonic (0-1 h-post-fertilization) exposure at the



903 indicated temperature. Higher heat stress temperatures caused significant decreases in  
904 pupation height (ANOVA temperature effect,  $F_{8,189} = 7.744$ ,  $P < 0.0001$ ), but higher  
905 maternal loading of *Hsp23* removed this effect at 34°C (Sidak's test on pairwise  
906 difference at 34°C,  $***P < 0.001$ ). (B) Mean time to pupation (days +/- 95% confidence  
907 intervals) following early embryonic temperature exposure, as described above in A.  
908 Higher embryonic temperature exposure caused increased time to pupation (Table 3;  
909 ANOVA temperature effect,  $F_{8,169} = 9.605$ ,  $P < 0.0001$ ), and there was a trend of  
910 maternal loading of *Hsp23* attenuating this effect (maternal genotype effect,  $F_{1,169} =$   
911  $2.928$ ,  $P = 0.0889$ , temperature x maternal genotype interaction,  $F_{8,169} = 0.6591$ ,  $P$   
912  $= 0.73$ ). (C) Mean time to eclosion (days +/- 95% confidence intervals) following early  
913 embryonic temperature exposure, as described above in A. Males took longer to eclose  
914 than females at all temperatures (ANOVA, sex effect,  $F_{1,347} = 30.263$ ,  $P < 0.00001$ ), but  
915 the effects of heat stress on development time were similar between the sexes (ANOVA,  
916 temperature x sex interaction,  $F_{8,347} = 0.149$ ,  $P = 0.70$ ). Data represent values from  
917 females (left panel) and males (right panel). The genotypes of the parents are indicated  
918 in the legends of each panel (female x male).  
919

# Figure 1

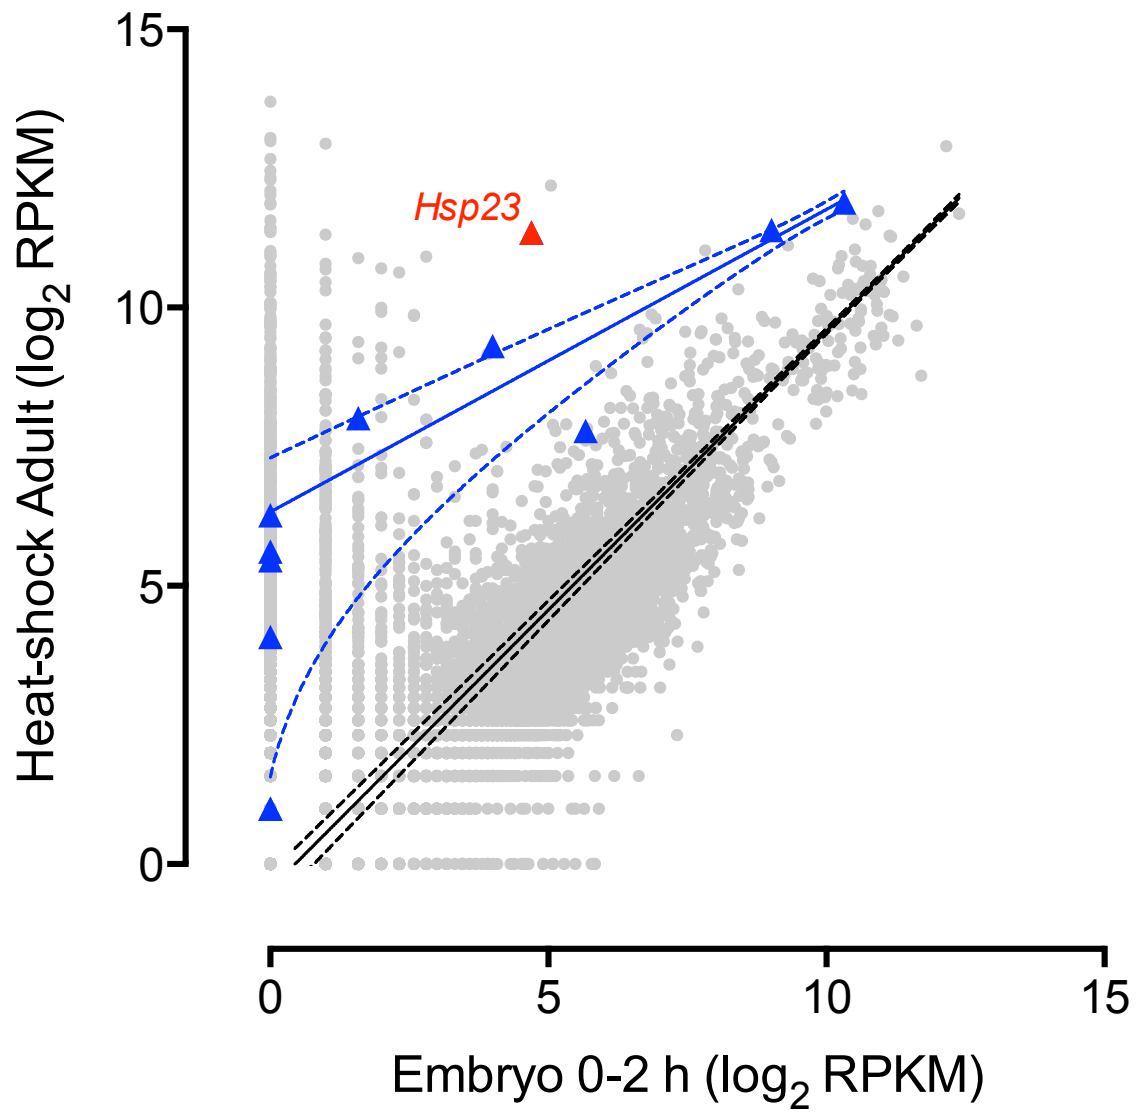

## Figure 2

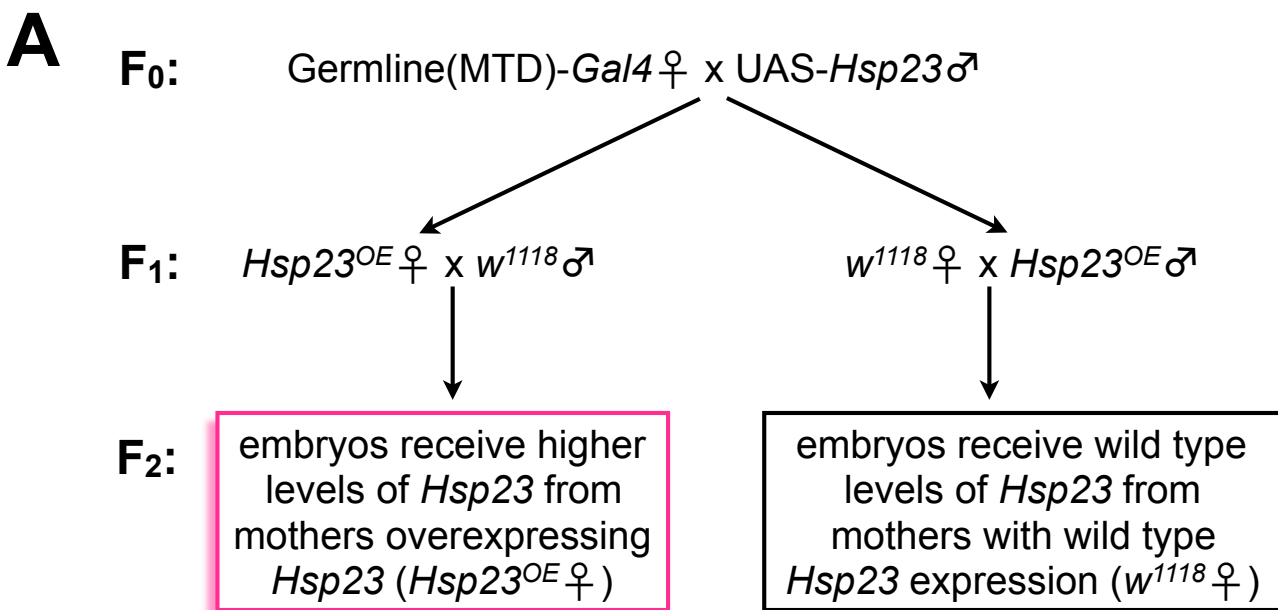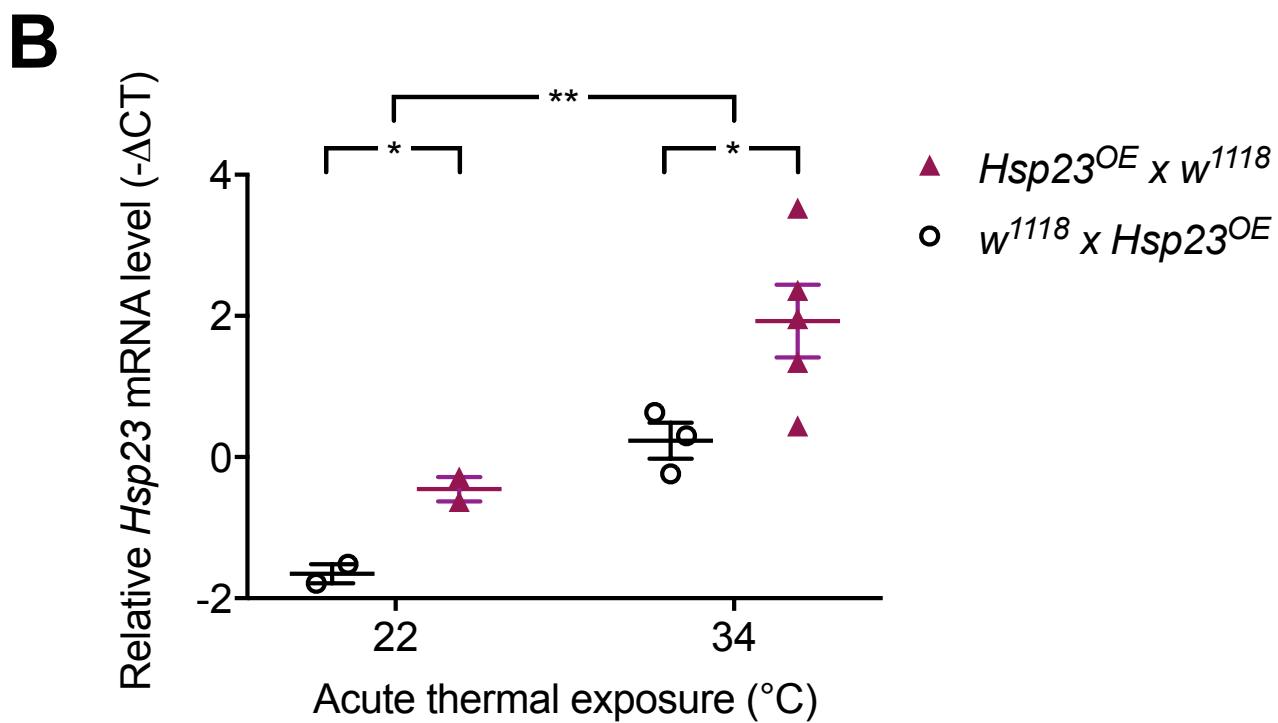

## Figure 3

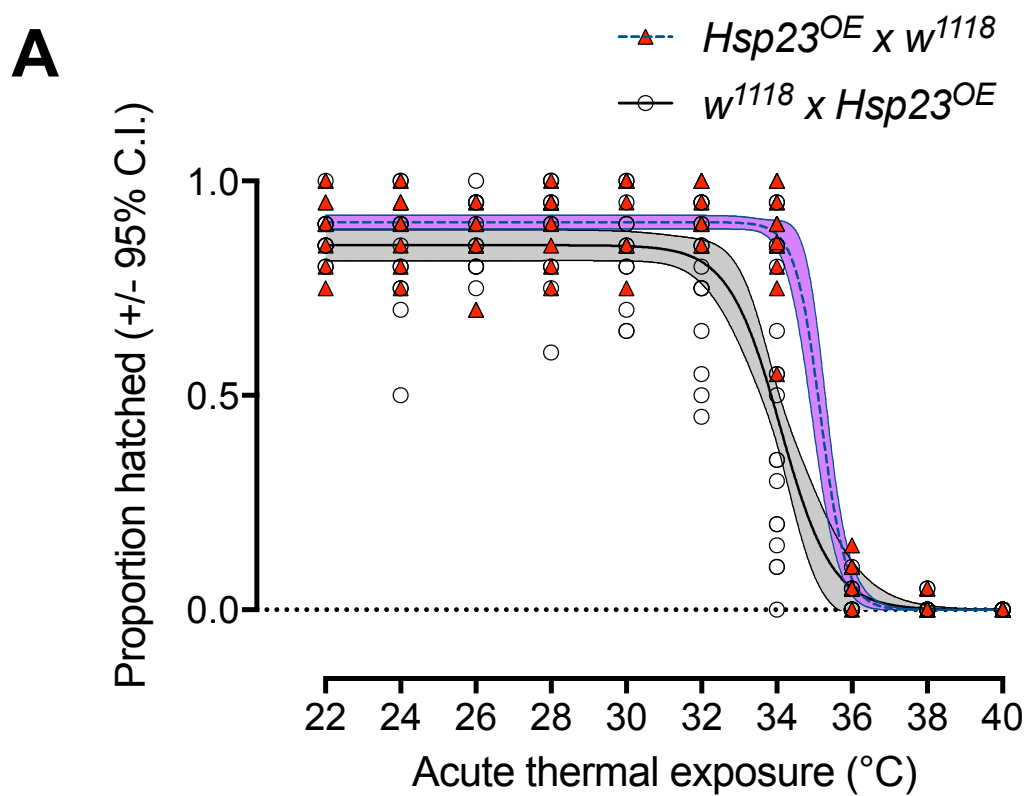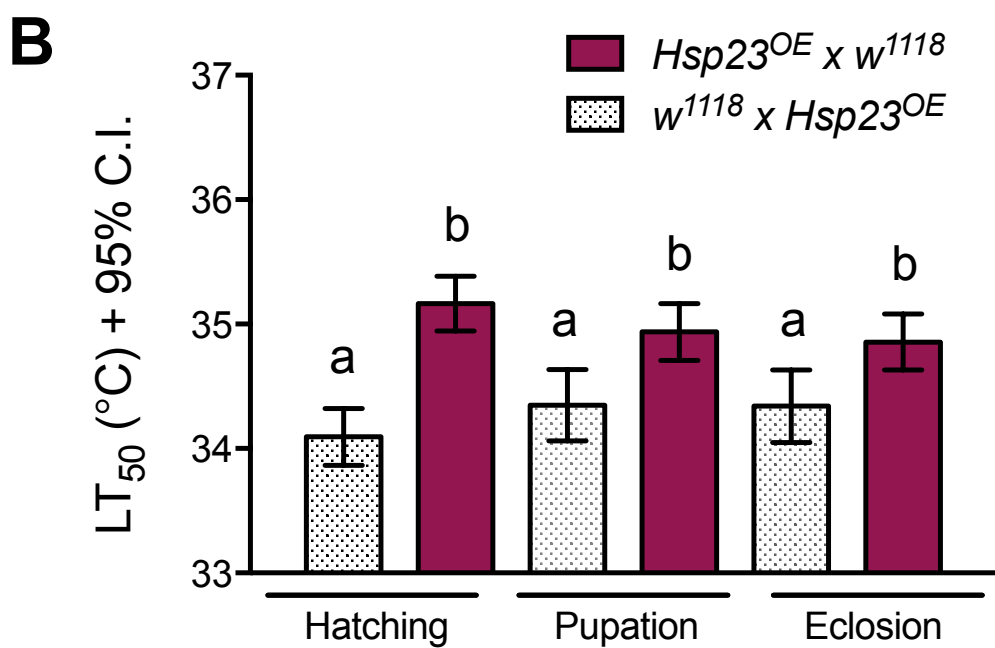

## Figure 4

**A**

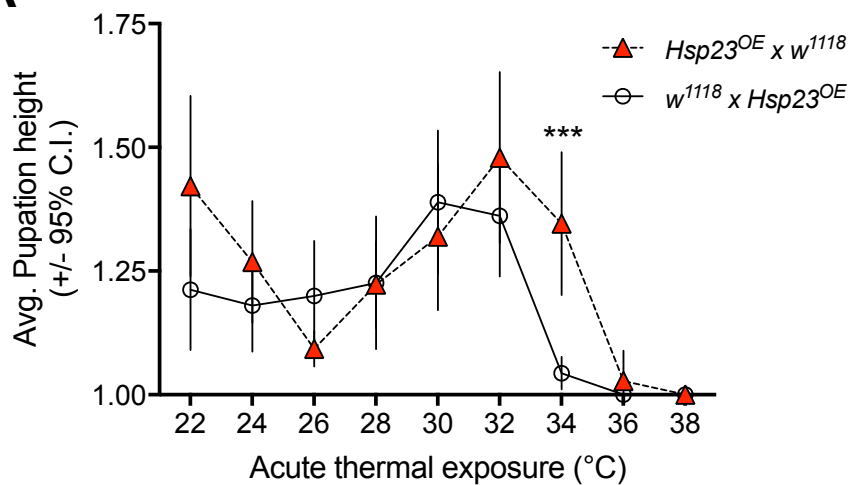

**B**

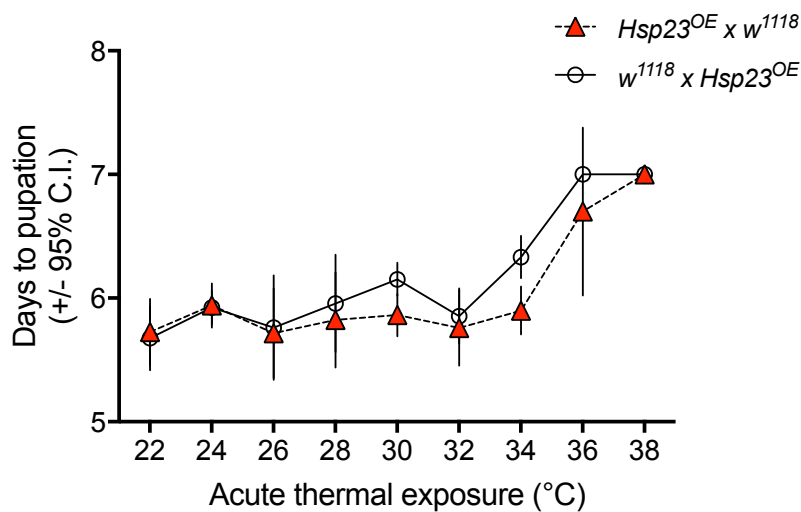

**C**

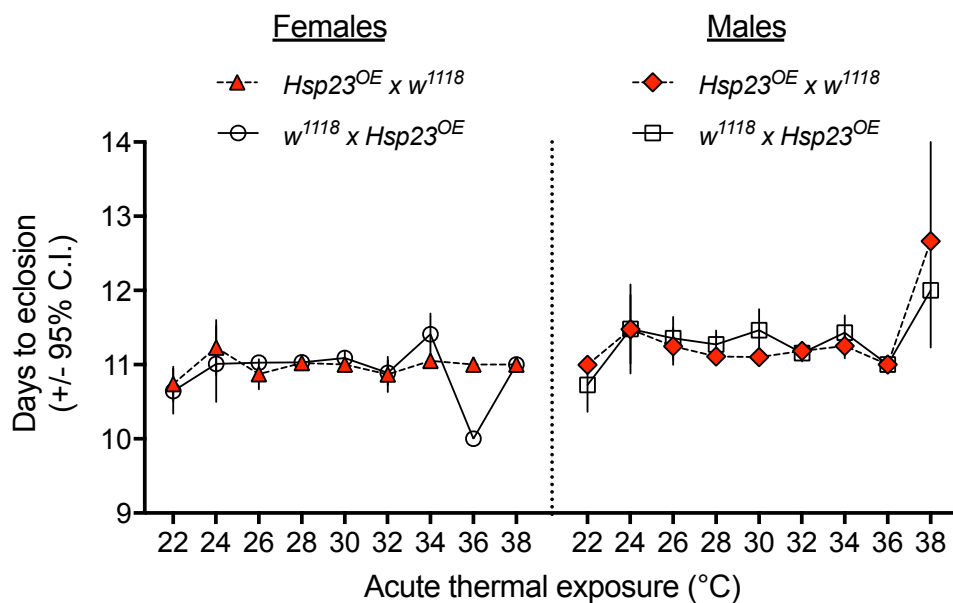

Source: https://www.biorxiv.org/content/10.1101/150102v1.full.pdf
